# Supplementary material
Source: HighWire-hosted journal article supplement (https://gut.bmj.com/content/gutjnl-2020-323951)
Supplement: inline-supplementary-material-7 [file inline-supplementary-material-7.pdf]

Table with 25 columns and 600+ rows. Columns include compound names (e.g., Aryl sulfate-, Azelaic acid-, beta-Alanyl-N(pi)-methyl-L-histidine+) and their corresponding values across 25 different categories or conditions.



|                                      |          |          |          |          |          |          |          |          |          |          |          |          |          |          |          |          |          |          |          |          |           |
|--------------------------------------|----------|----------|----------|----------|----------|----------|----------|----------|----------|----------|----------|----------|----------|----------|----------|----------|----------|----------|----------|----------|-----------|
| Coumarin:-                           | 10.1123  | 15.50175 | 7.970857 | 10.24421 | 8.601756 | 11.93884 | 1.935564 | 2.748946 | 11.30185 | 9.565509 | 1.725896 | 12.80734 | 10.62526 | 21.06173 | 2.076629 | 12.54409 | 13.76027 | 0.179048 | 1.385454 | 0.61963  | 0.038609  |
| Dimethylglycine:-                    | 0.985724 | 0.654237 | 1.219148 | 1.857943 | 1.226356 | 1.398067 | 1.539177 | 1.881422 | 2.28547  | 0.925269 | 1.264989 | 0.34455  | 0.603466 | 0.624446 | 1.446601 | 0.937956 | 0.503833 | -0.71875 | -1.0297  | 0.064057 | 0.014315  |
| Ethylmorphine:+                      | 0.998763 | 1.20994  | 1.419725 | 1.983571 | 1.074121 | 1.460996 | 1.68727  | 1.11182  | 1.481403 | 1.267048 | 1.104498 | 1.484458 | 2.246041 | 1.524626 | 1.452292 | 2.103317 | 1.531352 | 0.344166 | 0.451397 | 0.10478  | 0.032117  |
| Glycolate:-                          | 0.356572 | 0.313025 | 0.299899 | 0.336336 | 0.434926 | 0.283179 | 0.315559 | 0.556381 | 0.354797 | 0.281992 | 0.484745 | 0.316142 | 0.175381 | 0.279142 | 0.31405  | 0.327237 | 0.274832 | -0.26289 | -0.49397 | 0.10843  | 0.046985  |
| L-2-Amino-6-oxoheptanedioate:-       | 0.237423 | 0.113198 | 0.160511 | 0.125551 | 0.300342 | 0.211003 | 0.167468 | 0.137236 | 0.20647  | 0.279101 | 0.224996 | 0.163719 | 0.035917 | 0.151068 | 0.172353 | 0.116735 | 0.117155 | -0.60089 | -0.75555 | 0.10154  | 0.016569  |
| L-Anserine:+                         | 0.37818  | 0.551066 | 0.505128 | 0.598761 | 0.67347  | 0.36618  | 0.95564  | 1.03299  | 0.796259 | 0.44411  | 0.631106 | 0.191377 | 0.5635   | 0.330143 | 0.618206 | 0.595016 | 0.3416   | -0.21909 | -0.91114 | 0.43039  | 0.013425  |
| L-Metanephrine:+                     | 3.486566 | 1.883401 | 2.834478 | 2.821003 | 3.644563 | 2.503439 | 2.890398 | 2.315487 | 2.298654 | 2.552966 | 1.62198  | 2.685844 | 4.034717 | 2.921176 | 2.927242 | 5.31661  | 2.399552 | 0.240243 | 0.613085 | 0.34796  | 0.049745  |
| Lisinopril:-                         | 1.822201 | 1.915438 | 3.500683 | 2.442418 | 2.582136 | 1.983125 | 1.88559  | 1.930276 | 1.876723 | 1.356442 | 1.247376 | 2.78729  | 3.844165 | 2.757308 | 2.318892 | 2.369555 | 4.652627 | 0.394781 | 0.971347 | 0.13832  | 0.0083098 |
| Lys-Asn:+                            | 0.221778 | 0.203137 | 0.304434 | 0.328407 | 0.390999 | 0.305877 | 0.382991 | 0.265748 | 0.305508 | 0.153184 | 0.09639  | 0.388619 | 0.380118 | 0.373924 | 0.375968 | 0.614288 | 0.294313 | 0.468142 | 0.772671 | 0.063613 | 0.02101   |
| N-Acetyl-D-tryptophan:-              | 0.682711 | 0.417086 | 0.895321 | 0.802071 | 0.872153 | 0.16407  | 0.366368 | 0.781943 | 0.190497 | 0.254947 | 0.250537 | 0.65274  | 0.665034 | 0.959811 | 0.799415 | 1.060334 | 0.355379 | 0.228958 | 1.094    | 0.50002  | 0.015383  |
| N-Acetylbiaphos:+                    | 0.617804 | 0.379516 | 0.676705 | 0.283409 | 0.331063 | 0.285197 | 0.395252 | 0.24208  | 0.270986 | 0.263265 | 0.45155  | 0.462764 | 0.544836 | 0.572299 | 0.7376   | 0.580913 | 0.304757 | 0.315659 | 0.63337  | 0.28152  | 0.025346  |
| N-Formyldeemecolcine:-               | 3.689806 | 23.83929 | 3.871714 | 3.552119 | 5.287472 | 2.641002 | 5.414407 | 6.091949 | 5.08464  | 3.39182  | 3.901614 | 14.3215  | 5.969386 | 6.62537  | 8.681928 | 7.191873 | 10.68604 | 0.318542 | 0.739567 | 0.63945  | 0.040888  |
| N-Hydroxy-L-isoleucine:-             | 0.40522  | 0.575524 | 0.741868 | 0.735553 | 0.728373 | 0.784551 | 0.559135 | 0.550633 | 0.634306 | 0.579218 | 0.268785 | 0.836177 | 0.820312 | 0.678487 | 0.651308 | 0.79485  | 0.733948 | 0.185217 | 0.626388 | 0.21391  | 0.0053529 |
| N-Methylnicotinate:+                 | 3.60592  | 3.397543 | 5.439661 | 6.401879 | 4.348629 | 3.699079 | 5.680268 | 6.19603  | 7.599888 | 6.591307 | 3.015658 | 3.096852 | 5.339944 | 3.272665 | 5.163805 | 2.931801 | 4.492369 | -0.14641 | -0.56399 | 0.52674  | 0.036359  |
| N(alpha)-gamma-L-Glutamylhistamine:+ | 0.712775 | 0.545143 | 0.417171 | 0.391917 | 0.255675 | 0.306552 | 1.214707 | 0.590455 | 1.314584 | 0.221661 | 0.831145 | 0.300368 | 0.240678 | 0.323567 | 0.270048 | 0.322863 | 0.223139 | -0.64561 | -1.43589 | 0.068909 | 0.046139  |
| O-Succinyl-L-homoserine:-            | 1.959578 | 0.273107 | 0.336079 | 0.429511 | 0.718632 | 2.154506 | 0.537293 | 0.312258 | 0.844906 | 0.913911 | 0.547509 | 0.428817 | 0.14721  | 0.428349 | 0.556348 | 0.260954 | 0.366911 | -1.42371 | -0.80979 | 0.13895  | 0.032405  |
| Phenylacetylglutamate:+              | 1.276318 | 1.267817 | 1.962396 | 1.750107 | 1.214878 | 1.833827 | 1.457013 | 1.187764 | 1.699928 | 1.108765 | 1.462589 | 1.546096 | 2.48972  | 1.457817 | 1.72422  | 1.733496 | 1.659103 | 0.189355 | 0.407836 | 0.30983  | 0.0404    |
| Propionic acid:-                     | 0.667262 | 0.741134 | 0.897588 | 0.883121 | 0.744009 | 1.010739 | 0.847543 | 0.949876 | 0.962499 | 0.876973 | 0.67027  | 0.711793 | 0.815476 | 0.752351 | 0.635629 | 0.706928 | 0.603052 | -0.22661 | -0.29474 | 0.083896 | 0.014628  |
| Ribothymidine:+                      | 0.616694 | 0.528372 | 0.610137 | 0.602518 | 0.59557  | 0.637673 | 0.58893  | 0.501804 | 0.573972 | 0.560198 | 0.671528 | 0.796612 | 0.742703 | 0.62744  | 0.603007 | 0.639384 | 0.646142 | 0.175433 | 0.245807 | 0.05883  | 0.023837  |
